# Supplementary material for: Synthesis of and iodine capture with MSx (Ag2S, Bi2S3, Cu2S)–polyacrylonitrile composites
Source: Royal Society of Chemistry journal article supplement (doi:10.1039/d3nj05961h), 2024-01-01
Supplement: d3nj05961h1.pdf [file d3nj05961h1.pdf]

SUPPORTING INFORMATION

***Synthesis of and iodine capture with  $MS_x$  ( $Ag_2S$ ,  $Bi_2S_3$ ,  $Cu_2S$ )-polyacrylonitrile composites***

Brian J Riley<sup>a1</sup>, Saehwa Chong<sup>a</sup>, and Nathan L. Canfield

<sup>a</sup> *Pacific Northwest National Laboratory, 902 Battelle Blvd, Richland, WA 99354.*

*Keywords:* iodine sorbent; radioiodine, silver sulfide; bismuth sulfide; copper sulfide; polyacrylonitrile

---

<sup>1</sup> Corresponding author: [brian.riley@pnnl.gov](mailto:brian.riley@pnnl.gov); +1 (509) 372-4651

## 1 Conceptual Design of Sorbent System

The conceptual design for the current study is shown in Figure S1. The loading temperature of 130°C was selected for a few reasons. In previous studies,<sup>S1, 2</sup> temperatures in this range worked well for loading PAN composites. Higher temperatures (e.g., 150°C) showed evidence of iodine interactions with the PAN matrix itself,<sup>S3</sup> while studies at room temperature showed very little PAN-iodine interactions.<sup>S4</sup> Thus, it seems that 130°C is in a range of relevant temperature for iodine off-gas capture from radiological process implementation and in the sweet-spot for loading onto an active getter with minimal loading into the PAN. Also, the loading times selected for this study were based off our previous work.<sup>S1</sup> While the reactions shown in Figure 1 (in the paper) predict the formation of elemental sulfur with a melting temperature of 112.8°C, it is more than likely that conversion of the metal sulfides (i.e., Ag<sub>2</sub>S, Bi<sub>2</sub>S<sub>3</sub>, and Cu<sub>2</sub>S) into metal iodides (i.e., AgI, BiI<sub>3</sub>, CuI) will result in the formation of elemental sulfur that will melt within the sorbent. While it is possible that these will agglomerate and could clog the internal pores of the PAN scaffold, this was not generally observed in SEM-EDS analyses of iodine-loaded *MS<sub>x</sub>*-PAN composites in this study except for the 80Cu<sub>2</sub>S-PAN+I sample (see Figure 4 in the paper).

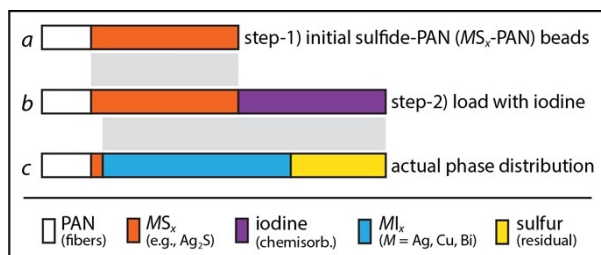

**Figure S1. Graphic representation of multi-phase sorbent after iodine reaction showing (a) the initial *MS<sub>x</sub>*-PAN composite, (b) the *MS<sub>x</sub>*-PAN composite after iodine loading, and (c) the actual phase distribution of (b) according to the thermodynamic predictions; note that these values are arbitrarily shown as an example.**

The first step in this study was to make PAN composites with Ag<sub>2</sub>S, which is why different loadings were used (i.e., 75%, 80%, and 90%). The overall appearance of the 90Ag<sub>2</sub>S-PAN composites showed that the spherical-type shapes were not maintained as well at loadings higher than 80 mass% so the 80 mass% loading level was used for the subsequent samples produced, i.e., 80Bi<sub>2</sub>S<sub>3</sub>-PAN and 80Cu<sub>2</sub>S-PAN.

## 2 Making Composites

**Table S1. Compositions for each batch of  $MS_x$ -PAN composite beads including the sample ID, mass of  $MS_x$  ( $m_{MS_x}$ ), mass of PAN ( $m_{PAN}$ ), and the volume of DMSO ( $V_{DMSO}$ ).**

| Sample                                | $m_{MS_x}$ (g) | $m_{PAN}$ (g) | $V_{DMSO}$ (mL) |
|---------------------------------------|----------------|---------------|-----------------|
| 75Ag <sub>2</sub> S-PAN               | 0.6015         | 0.2014        | 3.0             |
| 80Ag <sub>2</sub> S-PAN               | 0.8003         | 0.2004        | 3.0             |
| 90Ag <sub>2</sub> S-PAN               | 1.2004         | 0.1336        | 2.0             |
| 80Bi <sub>2</sub> S <sub>3</sub> -PAN | 0.8004         | 0.2002        | 3.0             |
| 80Cu <sub>2</sub> S-PAN               | 0.8009         | 0.2004        | 3.0             |

### 3 X-Ray Diffraction Data

**Table S2. Summary of XRD data for as-received  $MS_x$  reagents including the Inorganic Crystal Structure Database (ICSD) number, space group (SG), SG#, mass% of the phase based on Rietveld refinements, and the goodness of fit (Rwp) value.**

| Sample ID                             | Phase                          | ICSD#  | Space Group             | SG# | Mass% | Rwp    |
|---------------------------------------|--------------------------------|--------|-------------------------|-----|-------|--------|
| Ag <sub>2</sub> S powder              | Ag <sub>2</sub> S              | 182916 | <i>P2<sub>1</sub>/c</i> | 14  | 100.0 | 4.320  |
| Bi <sub>2</sub> S <sub>3</sub> powder | Bi <sub>2</sub> S <sub>3</sub> | 153946 | <i>Pnma</i>             | 62  | 100.0 | 14.772 |
| Cu <sub>2</sub> S powder              | Cu <sub>2</sub> S              | —      | <i>Abm2</i>             | 39  | 100.0 | —      |

**Table S3. Summary of XRD data for as-made  $MS_x$ -PAN composites including the ICSD number, space group (SG), SG#, mass% of the phase based on Rietveld refinements, and the Rwp value.**

| Sample ID                              | Phase                          | ICSD#  | Space Group             | SG# | Mass% | Rwp   |
|----------------------------------------|--------------------------------|--------|-------------------------|-----|-------|-------|
| 75%Ag <sub>2</sub> S-PAN               | Ag <sub>2</sub> S              | 182916 | <i>P2<sub>1</sub>/c</i> | 14  | 100.0 | 4.504 |
| 80%Ag <sub>2</sub> S-PAN               | Ag <sub>2</sub> S              | 182916 | <i>P2<sub>1</sub>/c</i> | 14  | 100.0 | 4.435 |
| 90%Ag <sub>2</sub> S-PAN               | Ag <sub>2</sub> S              | 182916 | <i>P2<sub>1</sub>/c</i> | 14  | 100.0 | 4.725 |
| 80%Bi <sub>2</sub> S <sub>3</sub> -PAN | Bi <sub>2</sub> S <sub>3</sub> | 153946 | <i>Pnma</i>             | 62  | 100.0 | 8.144 |
| 80%Cu <sub>2</sub> S-PAN               | Cu <sub>2</sub> S              | 100333 | <i>Abm2</i>             | 39  | 100.0 | —     |

**Table S4. Summary of XRD data for iodine-loaded  $MS_x$ -PAN composites including the ICSD number, space group (SG), SG#, mass% of the phase based on Rietveld refinements, and the Rwp value.**

| Sample ID                                | Phase            | ICSD#  | Space Group             | SG# | Mass% | Rwp   |
|------------------------------------------|------------------|--------|-------------------------|-----|-------|-------|
| 75%Ag <sub>2</sub> S-PAN +I              | $\gamma$ -AgI    | 52361  | <i>F-43m</i>            | 216 | 70.8  | 5.568 |
|                                          | $\beta$ -AgI     | 15589  | <i>P6<sub>3</sub>mc</i> | 186 | 29.2  |       |
| 80%Ag <sub>2</sub> S-PAN+I               | $\gamma$ -AgI    | 52361  | <i>F-43m</i>            | 216 | 86.2  | 4.490 |
|                                          | $\beta$ -AgI     | 15589  | <i>P6<sub>3</sub>mc</i> | 186 | 13.8  |       |
| 90%Ag <sub>2</sub> S-PAN+I               | $\gamma$ -AgI    | 52361  | <i>F-43m</i>            | 216 | 81.9  | 5.095 |
|                                          | $\beta$ -AgI     | 15589  | <i>P6<sub>3</sub>mc</i> | 186 | 18.1  |       |
| 80%Bi <sub>2</sub> S <sub>3</sub> -PAN+I | BiI <sub>3</sub> | 36182  | R-3                     | 148 | 100.0 | 6.475 |
| 80%Cu <sub>2</sub> S-PAN+I               | CuI              | 163427 | <i>F-43m</i>            | 216 | 100.0 | 5.374 |

## SUPPORTING INFORMATION

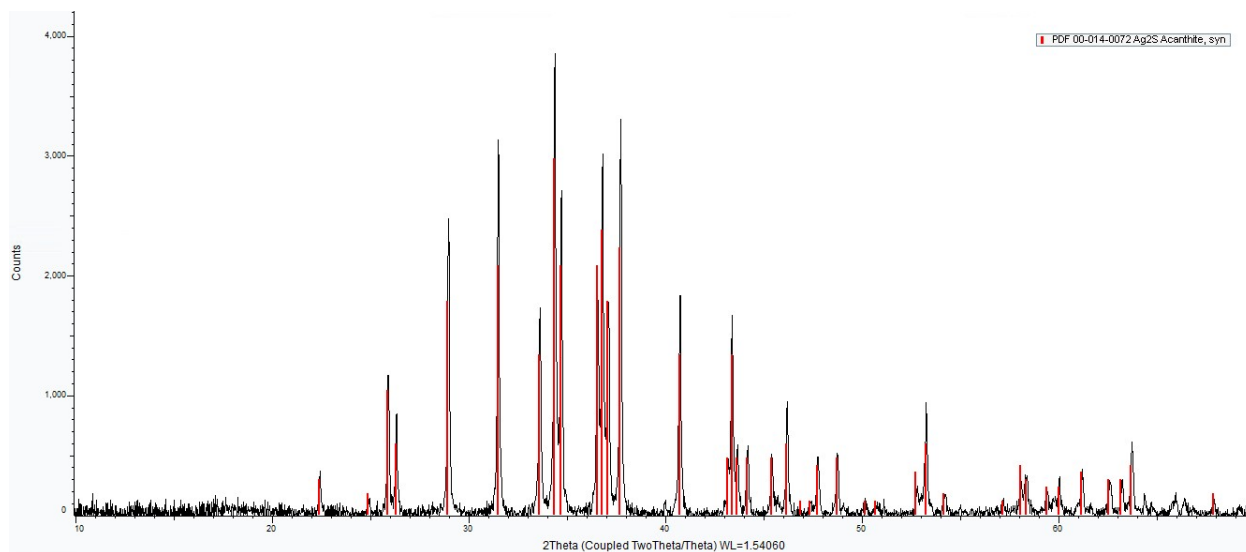

**Figure S2.** As-received  $\text{Ag}_2\text{S}$  reagent showing ICDD peak location fitting with the  $\text{Ag}_2\text{S}$  (acanthite, syn) phase (PDF 14-0072).

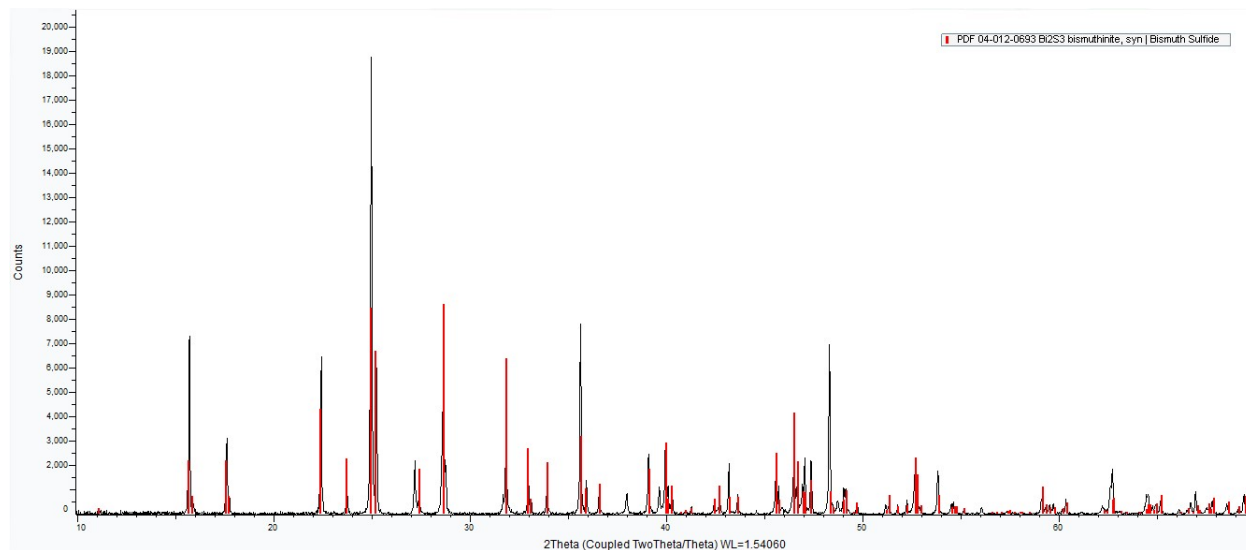

**Figure S3.** As-received  $\text{Bi}_2\text{S}_3$  reagent showing ICDD peak location fitting with the  $\text{Bi}_2\text{S}_3$  (bismuthinite, syn) phase (PDF 04-012-0693).

## SUPPORTING INFORMATION

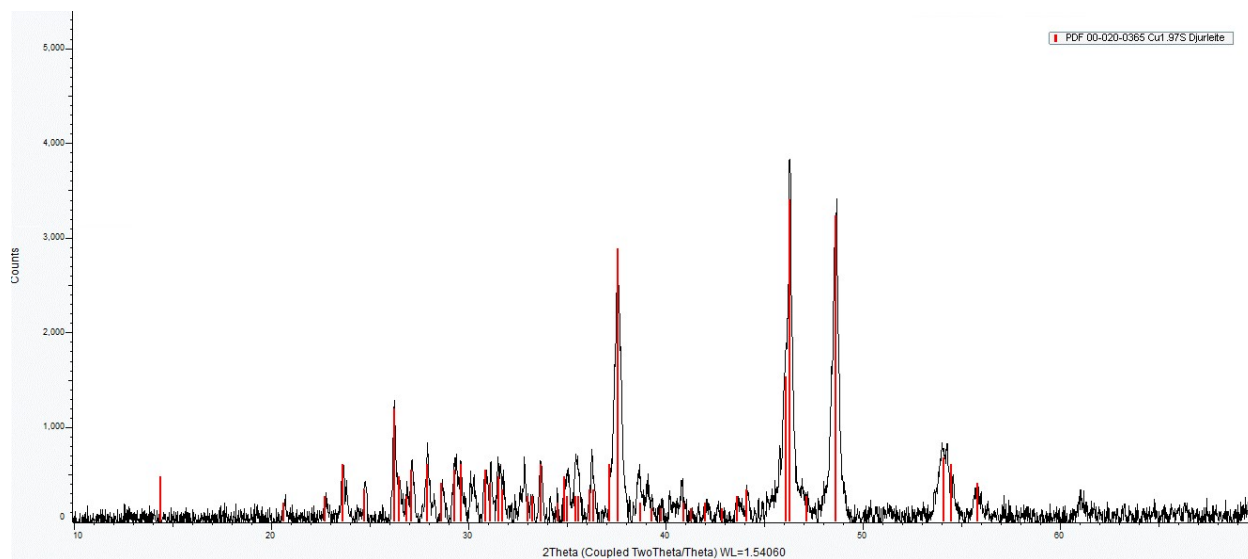

**Figure S4. As-received  $\text{Cu}_2\text{S}$  reagent showing ICDD peak location fitting with the  $\text{Cu}_{1.97}\text{S}$  phase (20-0365) not in the ICSD.**

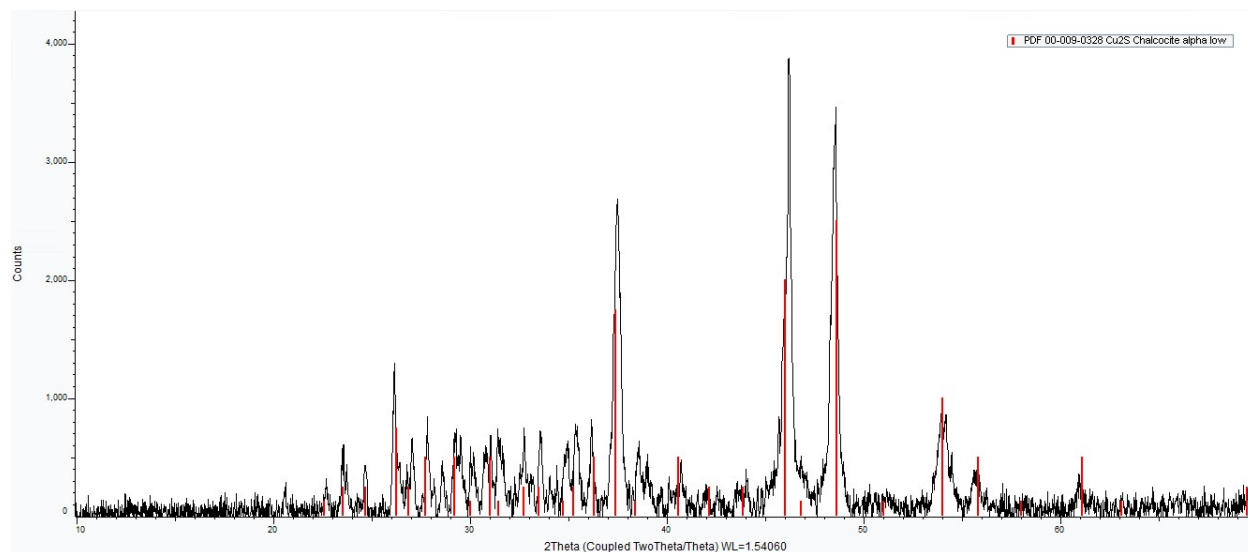

**Figure S5. As-received  $\text{Cu}_2\text{S}$  reagent showing ICDD peak location fitting with the  $\text{Cu}_2\text{S}$  phase (09-0328) not in the ICSD.**

SUPPORTING INFORMATION

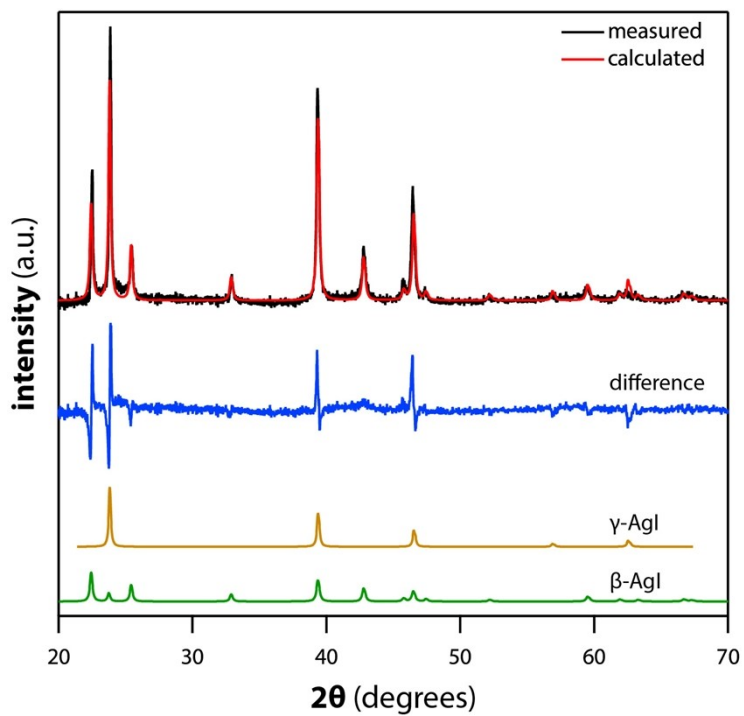

**Figure S6. Summary of Rietveld refinement for 75%Ag<sub>2</sub>S-PAN+I showing the peak contributions for γ-AgI and β-AgI.**

#### 4 Scanning Electron Microscopy and Energy Dispersive Spectroscopy Data

EDS was collected in low vacuum conditions (30Pa). Due to the partial atmosphere in the chamber, the electron beam will be scattered. Therefore, any quantitative results are for comparison only, and are not truly quantitative.

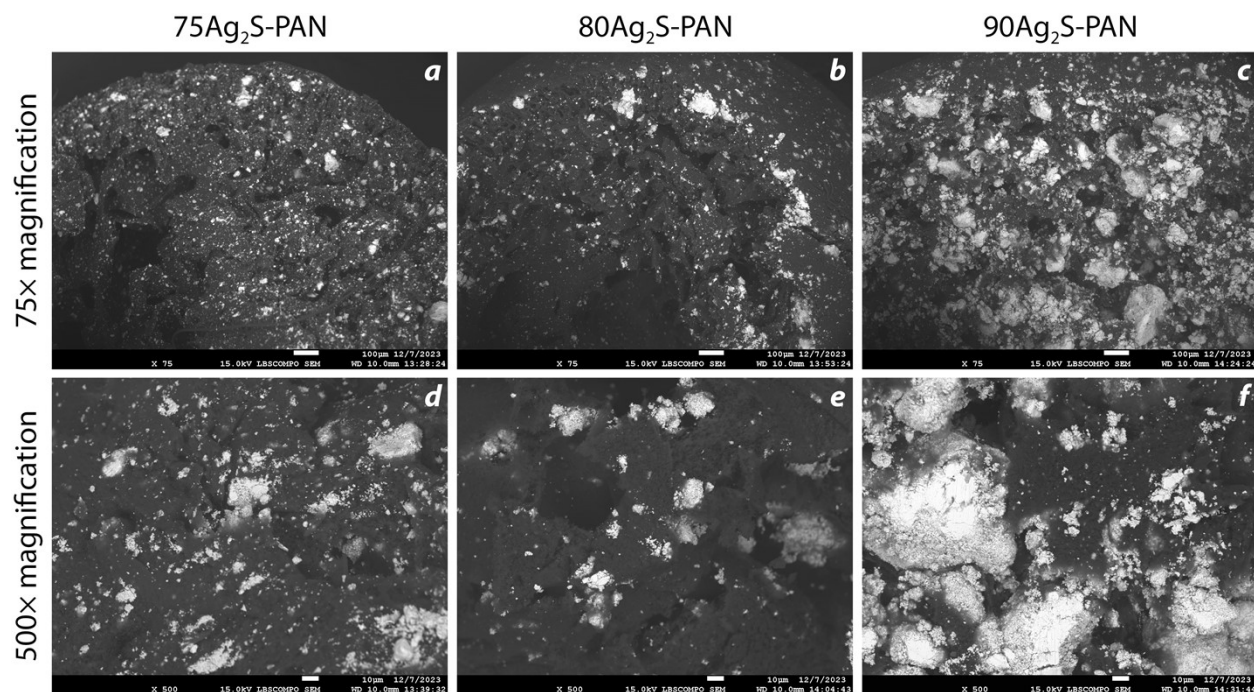

**Figure S7.** SEM micrographs for Ag<sub>2</sub>S-PAN samples without iodine including (a-c) 75× and (d-f) 500× magnification micrographs for (a,d) 75Ag<sub>2</sub>S-PAN, (b,e) 80Ag<sub>2</sub>S-PAN, and (c,f) 90Ag<sub>2</sub>S-PAN.



# SUPPORTING INFORMATION

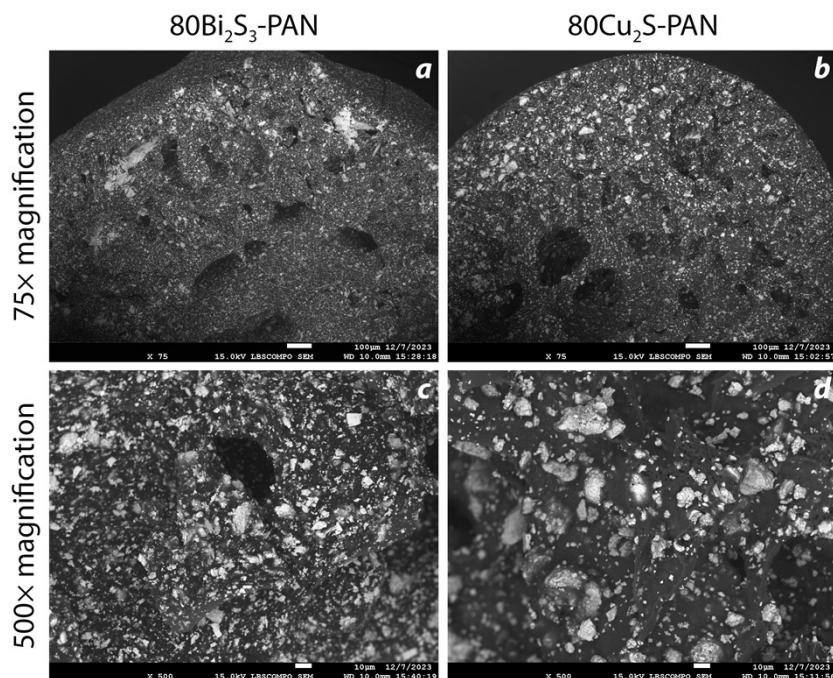

**Figure S8. SEM micrographs for (a,b)  $80\text{Bi}_2\text{S}_3\text{-PAN}$  and (c,d)  $80\text{Cu}_2\text{S-PAN}$  without iodine including (a,b)  $75\times$  and (c,d)  $500\times$  magnification micrographs.**

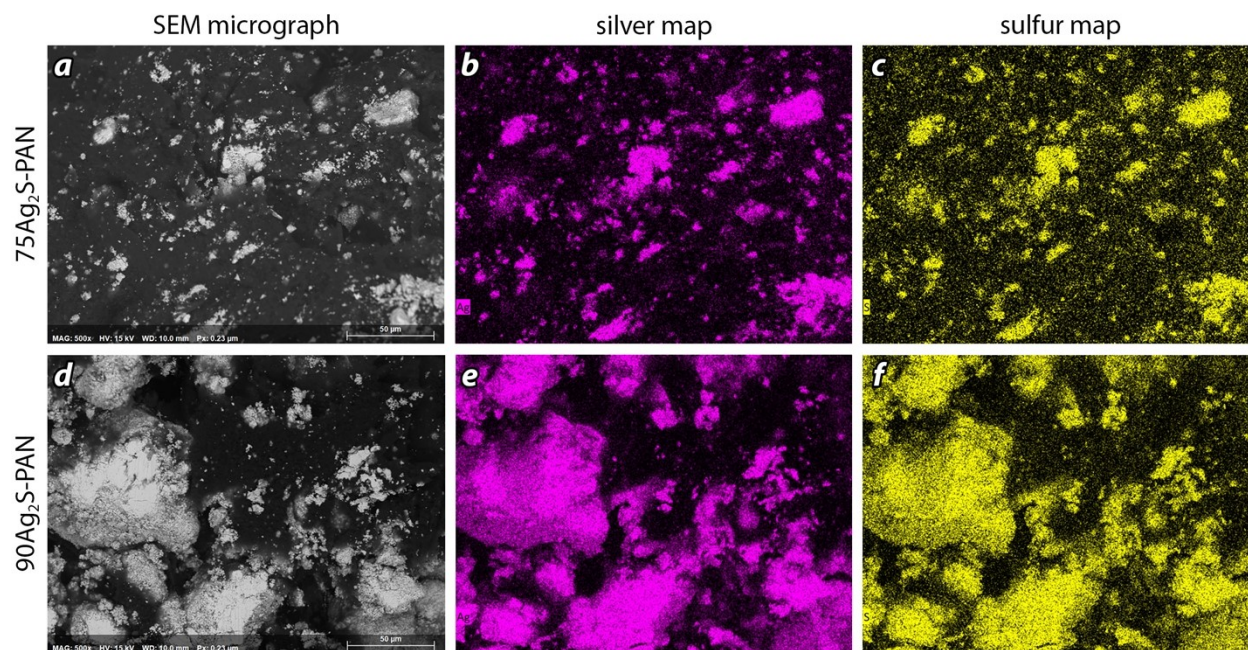

**Figure S9. (a,d) SEM and (b,c,e,f) EDS data for (a-c)  $75\text{Ag}_2\text{S-PAN}$  and (d-f)  $90\text{Ag}_2\text{S-PAN}$  composites showing the (b,e) Ag-maps and (c,f) S-maps. Note that the  $80\text{Ag}_2\text{S-PAN}$  data is not provided but looked similar.**



# SUPPORTING INFORMATION

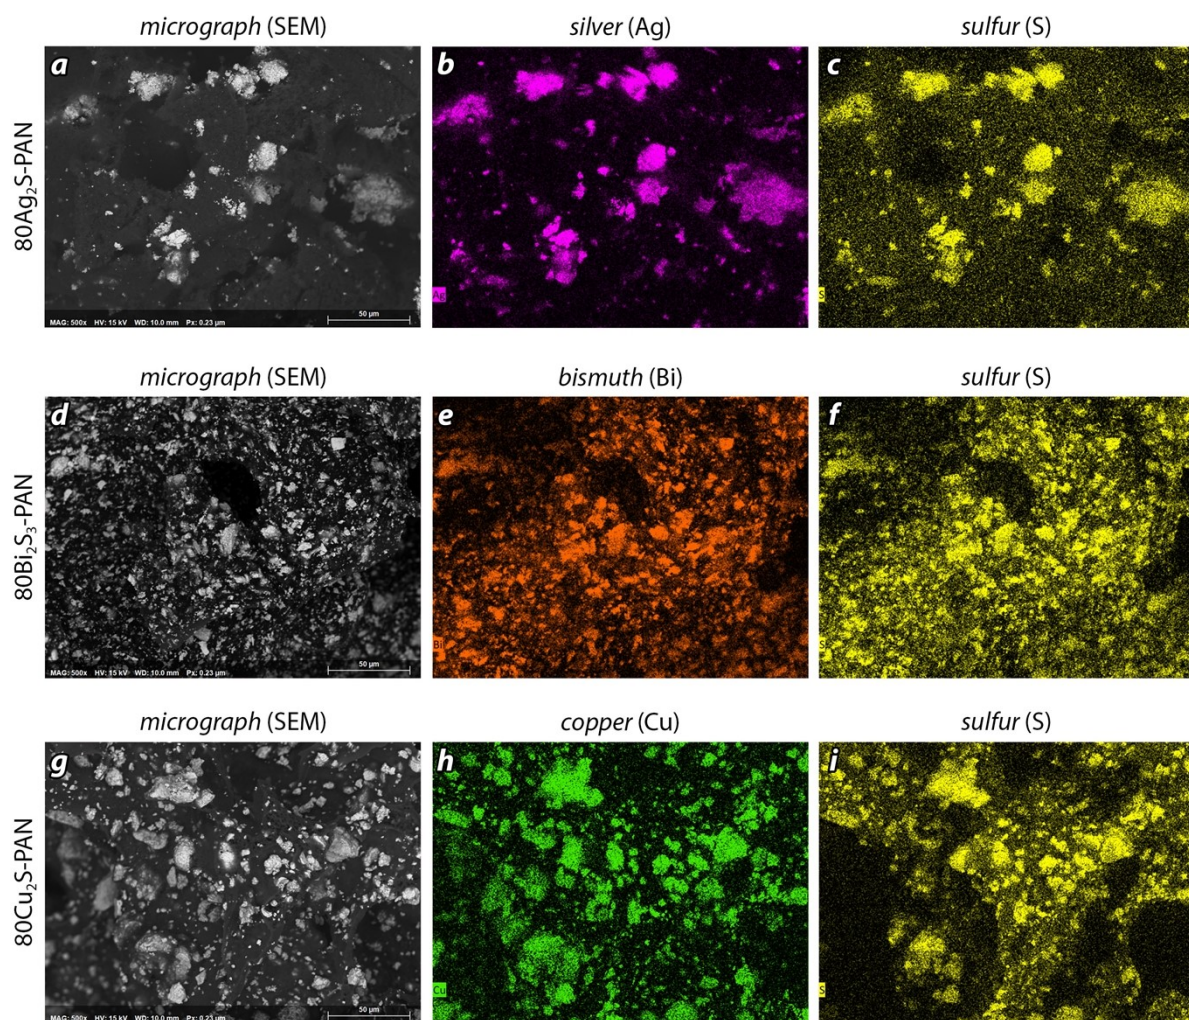

**Figure S10.** (a,d,g) SEM and (b,c,e,f,h,i) EDS data for (a-c) 80Ag<sub>2</sub>S-PAN, (d-f) 80Bi<sub>2</sub>S<sub>3</sub>-PAN, and (g-i) 80Cu<sub>2</sub>S-PAN composites showing the (b) Ag-map, (e) Bi-map, (h) Cu-map, and (c,f,i) S-maps.

## 5 Comparison with other PAN Composites for Iodine Capture

A summary of some previous experiments on PAN composites for iodine capture are provided in Table S5.

**Table S5. Summary of iodine loading in PAN composites from the literature including the composite sorbent type, the active sorbent, the loading temperature ( $T_{\text{LOAD}}$ ), the iodine loading ( $q_e = \text{mg/g}$ ), and the reference.**

| Sorbent type                          | Sorbent (mass%)                                      | $T_{\text{LOAD}}$ (°C) | Iodine loading (mg/g) | Reference                  |
|---------------------------------------|------------------------------------------------------|------------------------|-----------------------|----------------------------|
| 75Ag-PAN                              | Ag <sup>0</sup> (75%)                                | 120                    | 753                   | Chong et al. <sup>S1</sup> |
| 75Bi-PAN                              | Bi <sup>0</sup> (75%)                                | 120                    | 474                   | Chong et al. <sup>S1</sup> |
| 75Cu-PAN                              | Cu <sup>0</sup> (75%)                                | 120                    | 1457                  | Chong et al. <sup>S1</sup> |
| 75Sn-PAN                              | Sn <sup>0</sup> (75%)                                | 120                    | 1669                  | Chong et al. <sup>S1</sup> |
| $x\text{Bi}_2\text{S}_3$ -PAN         | Bi <sub>2</sub> S <sub>3</sub> (30, 50, 70, 80, 90%) | 85                     | 490–1203              | Yu et al. <sup>S5</sup>    |
| $x\text{SnS}_2$ -PAN                  | SnS <sub>2</sub> (10, 30, 50, 70, 80, 90%)           | 85                     | 536–2727              | Yu et al. <sup>S6</sup>    |
| $x\text{Sn}_2\text{S}_3$ -PAN         | Sn <sub>2</sub> S <sub>3</sub> chalcogel (33, 50%)   | 20–25                  | 487, 1144             | Riley et al. <sup>S4</sup> |
| 75Ag <sub>2</sub> S-PAN               | Ag <sub>2</sub> S (75%)                              | 130                    | 668                   | <i>Current study</i>       |
| 80Ag <sub>2</sub> S-PAN               | Ag <sub>2</sub> S (80%)                              | 130                    | 723                   | <i>Current study</i>       |
| 90Ag <sub>2</sub> S-PAN               | Ag <sub>2</sub> S (90%)                              | 130                    | 826                   | <i>Current study</i>       |
| 80Bi <sub>2</sub> S <sub>3</sub> -PAN | Bi <sub>2</sub> S <sub>3</sub> (80%)                 | 130                    | 909                   | <i>Current study</i>       |
| 80Cu <sub>2</sub> S-PAN               | Cu <sub>2</sub> S (80%)                              | 130                    | 1095                  | <i>Current study</i>       |

## 6 References

- S1. S. Chong, B. J. Riley, R. M. Asmussen, A. Fujii Yamagata, J. Marcial, S. Lee and C. A. Burns, *ACS Appl. Polym. Mater.*, 2022, **4**, 9040-9051.
- S2. B. J. Riley, S. Chong and C. L. Beck, *Ind. Eng. Chem. Res.*, 2021, **60**, 17162-17173.
- S3. B. J. Riley, S. Chong, R. M. Asmussen, A. Bourchy and M. H. Engelhard, *ACS Appl. Polym. Mater.*, 2021, **3**, 3344-3353.
- S4. B. J. Riley, D. Pierce, A. J. Chun, J. Matyáš, W. C. Lepry, T. Garn, J. Law and M. G. Kanatzidis, *Environ. Sci. Technol.*, 2014, **48**, 5832-5839.
- S5. Q. Yu, X. Jiang, Z. Cheng, Y. Liao, Q. Pu and M. Duan, *New J. Chem.*, 2020, **44**, 16759-16768.
- S6. Q. Yu, X. Jiang and M. Duan, *Soc. Sci. Res. Net.*, 2021, DOI: 10.2139/ssrn.3978461.
